# Supplementary material
Source: PubMed Central journal article supplement (PMC9135956)
Supplement: NIHMS1759624-supplement-supinfo.pdf [file NIHMS1759624-supplement-supinfo.pdf]

Supp. Figure S1b

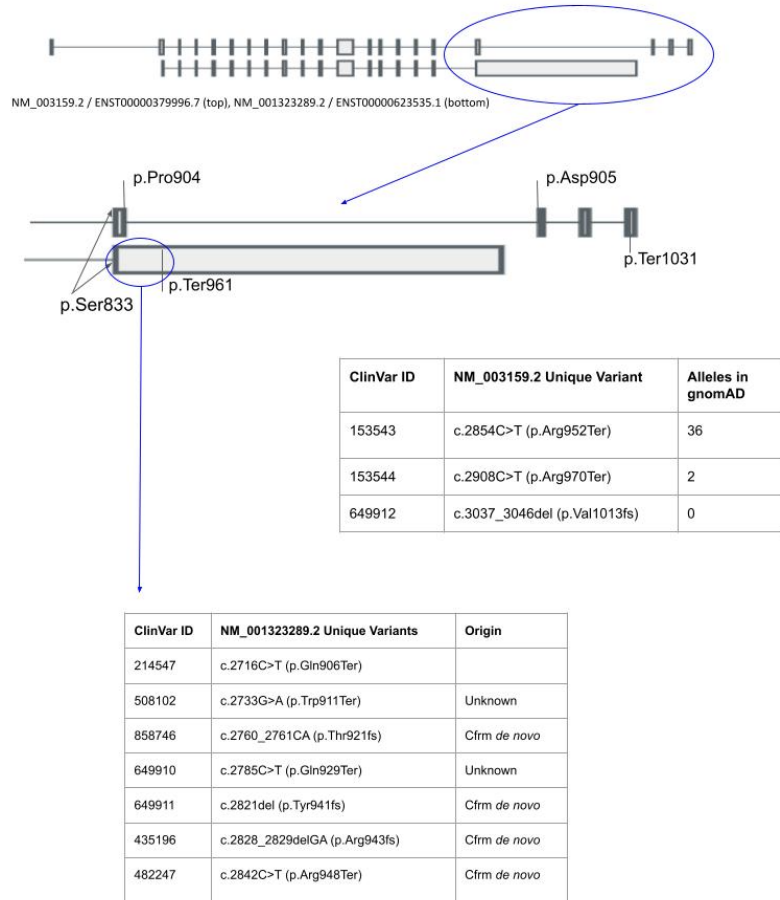

Supp Figure S2: Rett / Angelman-like genes PVS1 flowcharts

Rett Syndrome/Angelman-like genes PVS1 flowcharts. A. *MECP2*, B. *UBE3A*, C. *CDKL5*, D. *FOXG1*, E. *SLC9A6*, F. *TCF4*

Supp. Figure S2a: *MECP2*

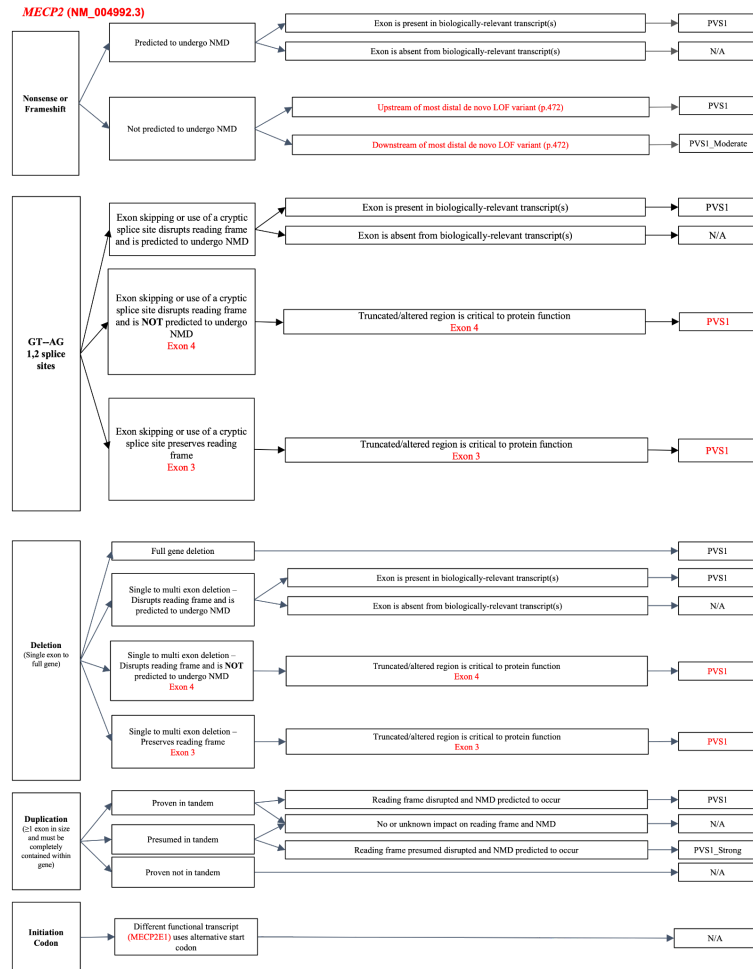

Supp. Figure S2b: *UBE3A*

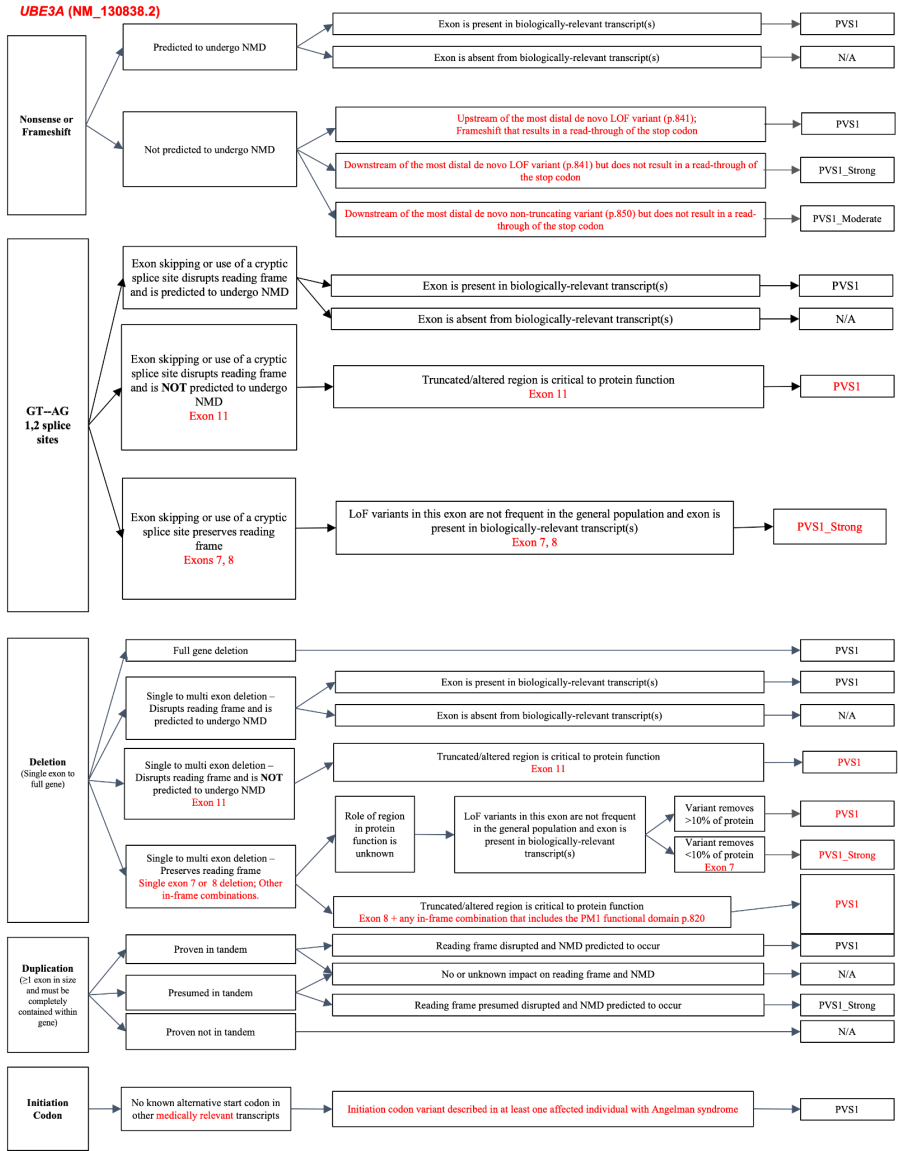

# Supp. Figure S2c: CDKL5

**CDKL5 (NM\_003159.2 and NM\_001323289.2)**

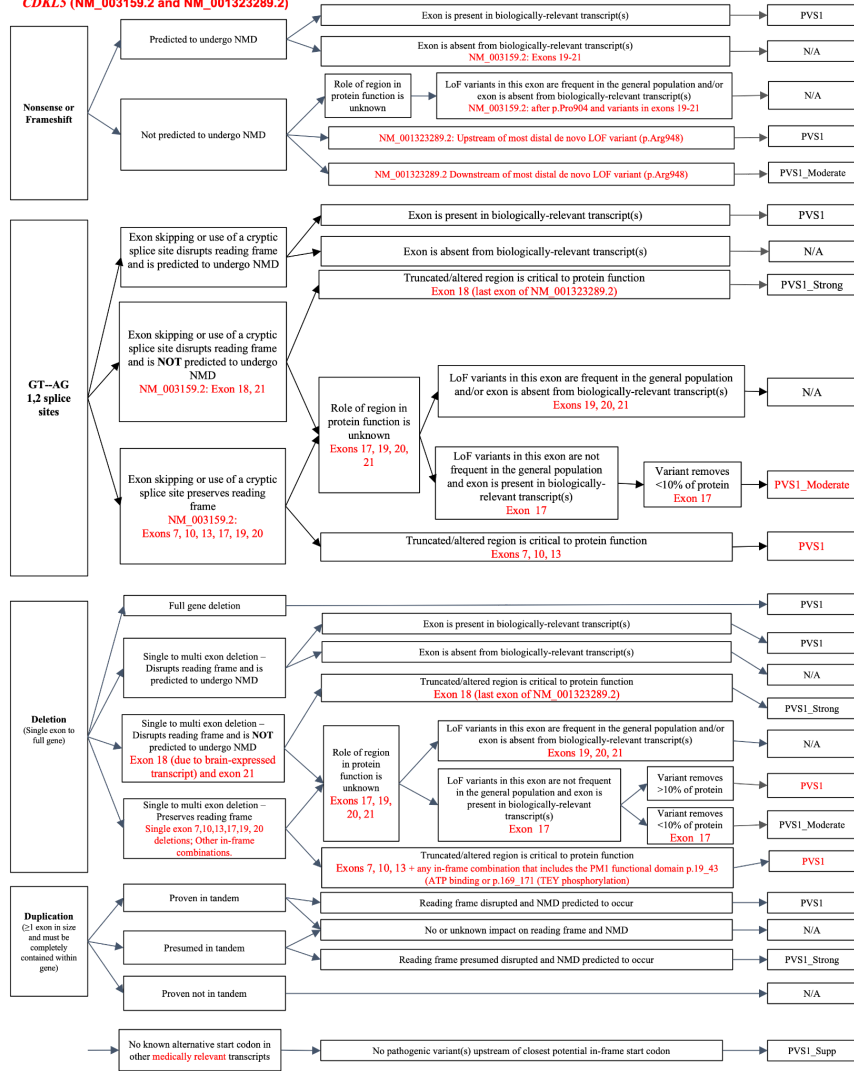

# Supp. Figure S2d: *FOXG1*

*FOXG1* (NM\_005249.4)

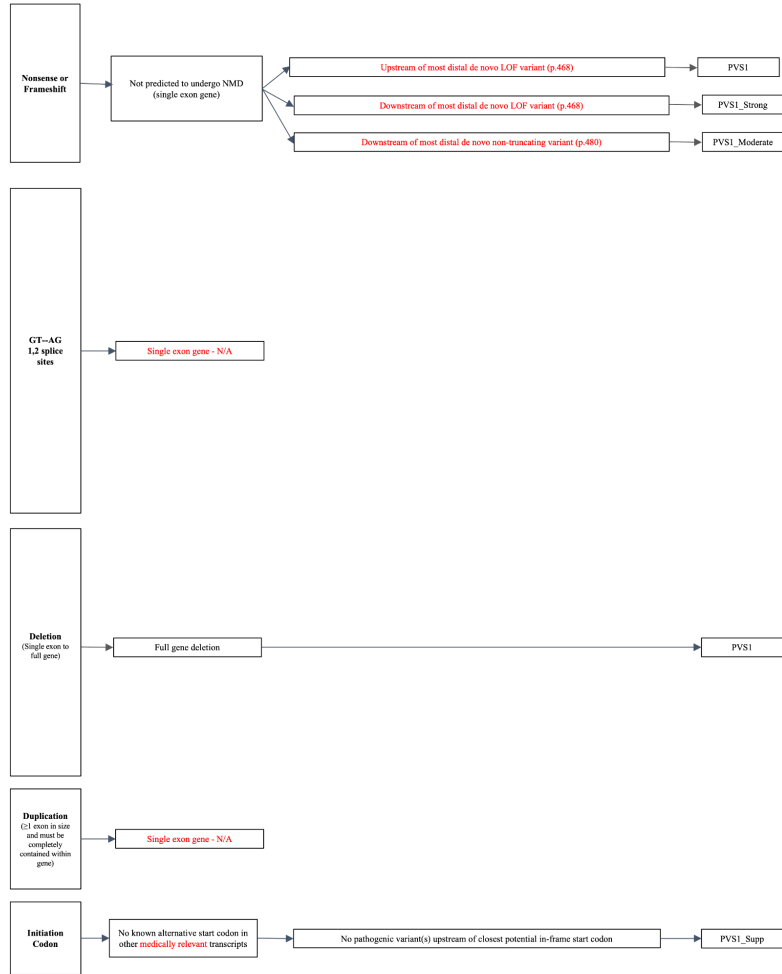

Supp. Figure S2e: SLC9A6

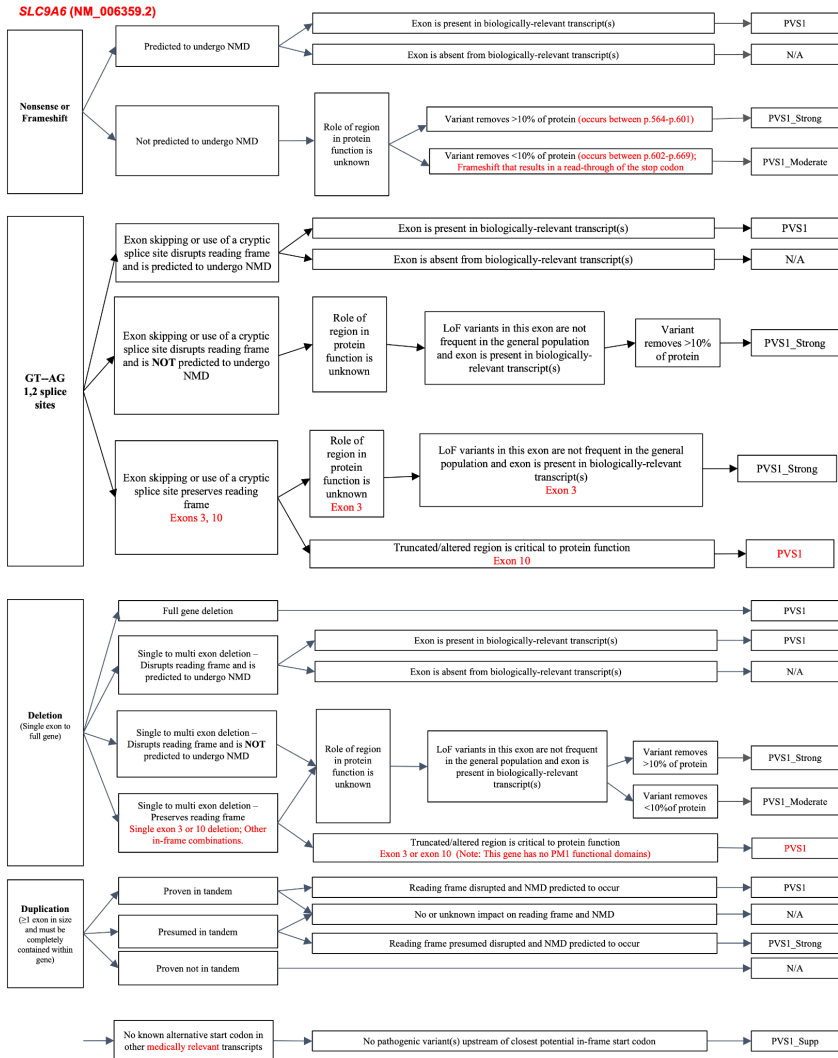

Supp. Figure S2f: *TCF4*

***TCF4* (NM\_001083962.1)**

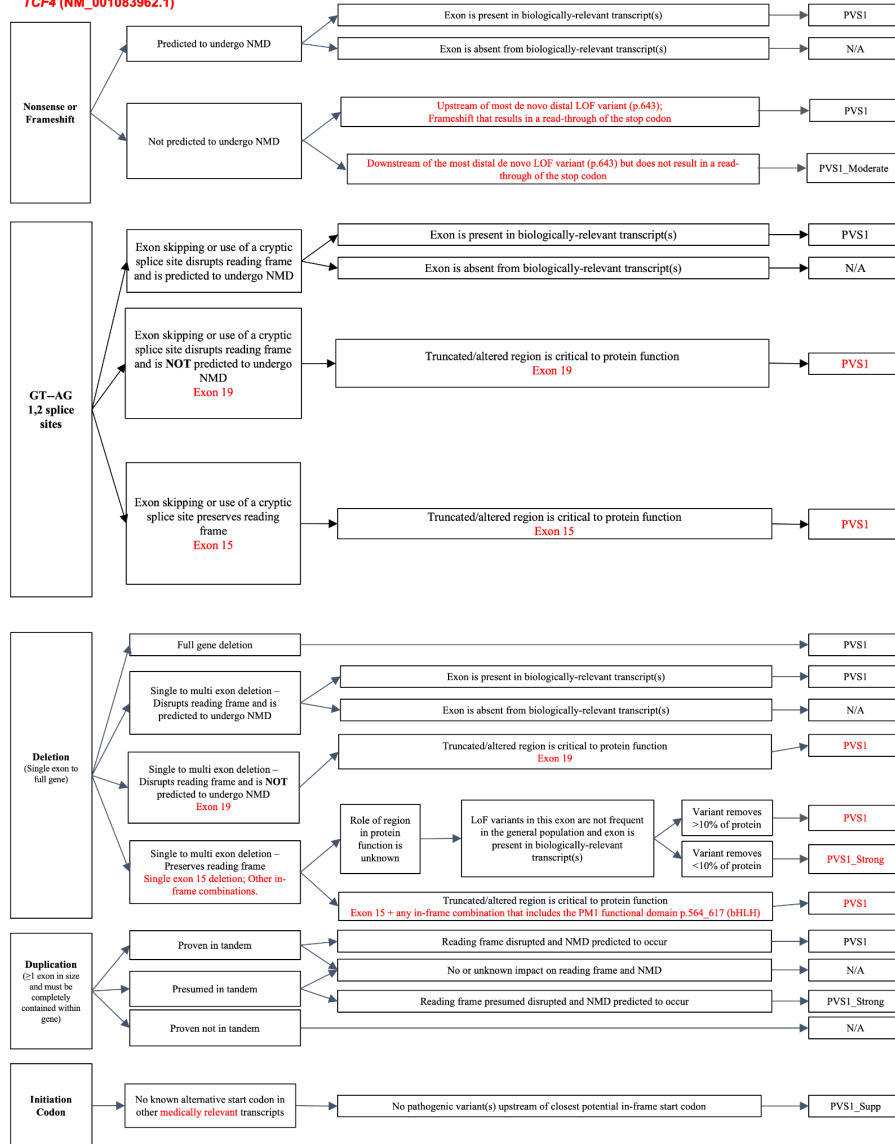



Supp. Table S1: Population Frequencies

|                                                                        | <i>MECP2</i> | <i>UBE3A</i> | <i>CDKL5</i> | <i>FOXP1</i> | <i>TCF4</i> | <i>SLC9A6</i> | <i>BA1</i> | <i>BS1</i> |
|------------------------------------------------------------------------|--------------|--------------|--------------|--------------|-------------|---------------|------------|------------|
| <i>Disease allele frequency (DAF) = calculated from Hardy-Weinberg</i> | 0.00008      | 0.00002      | 0.00002      | 0.00001      | 0.00002     | 0.0001        | 0.0003     | 0.00008    |

|                                 |                                                                                                                                                                                                                                                                  |                                                                                                                                                                                                                                                                                                                                                                                     |                                                                                                                                                |                                                                                                                                          |                                                                                                                                                                                               |                                                                                                                                                         |  |  |
|---------------------------------|------------------------------------------------------------------------------------------------------------------------------------------------------------------------------------------------------------------------------------------------------------------|-------------------------------------------------------------------------------------------------------------------------------------------------------------------------------------------------------------------------------------------------------------------------------------------------------------------------------------------------------------------------------------|------------------------------------------------------------------------------------------------------------------------------------------------|------------------------------------------------------------------------------------------------------------------------------------------|-----------------------------------------------------------------------------------------------------------------------------------------------------------------------------------------------|---------------------------------------------------------------------------------------------------------------------------------------------------------|--|--|
| <p><b>Reasoning for DAF</b></p> | <p>DAF= 0.00008 (general population). Prevalence is estimated at 1:10,000-1:23,000 female births. Using 1 in 10,000 females (adjust by 1.5 for XLD (assumes 50/50 male/female ratio) and very conservatively accounting for 20% due X inactivation patterns.</p> | <p>DAF = 0.00002 Prevalence of 1 /12000-1/24000; 10-20 percent (range from rare diseases. org at time of publication) of individuals with Angelman syndrome have mutations in UBE3A. Conservatively, using 1/12,000 (adjusted to allele frequency) and 20% attributable risk and multiplied times 2 as ~ 1/2 variant carriers will not be affected due to paternal inheritance.</p> | <p>DAF = 0.00002 Prevalence is 1:40,000-60,000. Conservatively using 1/40000 and adjusting for X-linked dominant (as described for MECP2).</p> | <p>DAF = 0.00001 Based on a prevalence of atypical RTT of 1/45000 (adjusted to allele frequency) (orphanet at time of publication) .</p> | <p>DAF = 0.00002 Approximately 500 affected individuals have been reported worldwide. PTHS prevalence estimates: 1:34,000 - 41,000. DAF based on 1:34,000 (adjusted to allele frequency).</p> | <p>DAF: 0.0001 Prevalence is estimated as 1:16,000 and 1:100,000. Using 1:16,000 prevalence and use 1.5 times your prevalence (x-linked recessive),</p> |  |  |
|---------------------------------|------------------------------------------------------------------------------------------------------------------------------------------------------------------------------------------------------------------------------------------------------------------|-------------------------------------------------------------------------------------------------------------------------------------------------------------------------------------------------------------------------------------------------------------------------------------------------------------------------------------------------------------------------------------|------------------------------------------------------------------------------------------------------------------------------------------------|------------------------------------------------------------------------------------------------------------------------------------------|-----------------------------------------------------------------------------------------------------------------------------------------------------------------------------------------------|---------------------------------------------------------------------------------------------------------------------------------------------------------|--|--|

|                           |                          |                              |                          |                           |                           |                           |  |  |
|---------------------------|--------------------------|------------------------------|--------------------------|---------------------------|---------------------------|---------------------------|--|--|
| <b><i>Inheritance</i></b> | <i>X-Linked Dominant</i> | <i>Autosomal (Imprinted)</i> | <i>X-Linked Dominant</i> | <i>Autosomal Dominant</i> | <i>Autosomal Dominant</i> | <i>X-Linked Recessive</i> |  |  |
|---------------------------|--------------------------|------------------------------|--------------------------|---------------------------|---------------------------|---------------------------|--|--|

\*DAF numbers are conservatively rounded up to the most significant digit

Supp. Table S2: Functional Assays

A. *MECP2* Functional Assays

| Name of Assay                                      | MECP2 chromatin binding assay                                                                                                             | MECP2 in vitro binding assay                          | In vitro transcription repression assay                                                                                                                                |
|----------------------------------------------------|-------------------------------------------------------------------------------------------------------------------------------------------|-------------------------------------------------------|------------------------------------------------------------------------------------------------------------------------------------------------------------------------|
| Measured Parameter                                 | Localization of MECP2 to highly methylated heterochromatic loci by quantitative immunofluorescence assay (MECP2 and DAPI co-localization) | Association of MECP2 with NCoR/SMRT co-repressors     | Luciferase activity in cell lysates co-expressing target reporters and wt or mutant MECP2 effector proteins                                                            |
| Expected Deleterious Result Range (PS3_Supporting) | MECP2 is distributed diffusely (no clustering pattern)                                                                                    | Abolished interaction by co-immunoprecipitation assay | Abolished transcription repression activity in cells transfected with the effector construct expressing mutant MECP2 compared to constructs expressing wild type MECP2 |

|                                    |                                    |                          |                 |
|------------------------------------|------------------------------------|--------------------------|-----------------|
| Expected Benign Result Range (BS3) | Not recommended                    | Not recommended          | Not recommended |
| References                         | PMID: 27929079, 23770565, 29718204 | PMID: 23770565, 29718204 | PMID: 23452848  |

B. *FOXG1* Functional Assays

| Name of assay      | Subcellular localization            | CDKN1A expression                     | Chromatin localization                                      | Stability of chromatin binding                          |
|--------------------|-------------------------------------|---------------------------------------|-------------------------------------------------------------|---------------------------------------------------------|
| Measured parameter | Immunofluorescence staining pattern | <i>CDKN1A</i> mRNA level quantitation | Chromocenter/nucleoplasmic ratios of fluorescence intensity | Strip-FRAP (fluorescence recovery after photobleaching) |

|                                                    |                                                                                                                                                      |                                              |                                                                                                          |                                                                                                  |
|----------------------------------------------------|------------------------------------------------------------------------------------------------------------------------------------------------------|----------------------------------------------|----------------------------------------------------------------------------------------------------------|--------------------------------------------------------------------------------------------------|
| Expected deleterious result range (PS3_Supporting) | Abnormal staining pattern such as nuclear speckles or nuclear and cytoplasmic localization instead of homogenous distribution throughout the nucleus | Increase of <i>CDKN1A</i> expression by ~30% | Ratio greater than 0.52 indicating more dispersed within chromatin compared to wild type (ratio of 0.45) | Decrease in chromatin affinity, $t_2$ of <2 seconds compared to 3 seconds or greater (wild type) |
| Expected benign result range (BS3)                 | Not recommended                                                                                                                                      | Not recommended                              | Not recommended                                                                                          | Not recommended                                                                                  |
| References                                         | PMID: 21280142<br>22091895                                                                                                                           | PMID: 21280142                               | PMID: 22091895                                                                                           | PMID: 22091895                                                                                   |

C. *CDKL5* Functional Assays

| <b>Name of Assay</b>                               | <b><i>in vitro</i> autophosphorylation assays</b> | <b><i>in vitro</i> phosphorylation-TEY assay</b> | <b><i>sub cellular</i> localization assay</b>                                     | <b><i>in vitro</i> kinase assay</b>                              |
|----------------------------------------------------|---------------------------------------------------|--------------------------------------------------|-----------------------------------------------------------------------------------|------------------------------------------------------------------|
| Measured Parameter                                 | Auto-phosphorylation of CDKL5                     | phosphorylation of TEY motif                     | subcellular distribution                                                          | enzymatic activity of CDKL5                                      |
| Expected Deleterious Result Range (PS3_Supporting) | Absence of auto-phosphorylation                   | Absence of phosphorylation                       | unidentifiable with Hoechst staining and localizes partially within the cytoplasm | Absence of phosphorylation of CDKL5 substrates (MeCP2 and Dnmt1) |
| Expected benign result range (BS3)                 | Not recommended                                   | Not recommended                                  | Not recommended                                                                   | Not recommended                                                  |
| References                                         | PMID: 16935860                                    | PMID: 16935860                                   | PMID: 16935860                                                                    | PMID: 27265524<br>16935860                                       |

D. *TCF4* Functional Assays

|               |                                |                                       |  |  |  |                  |
|---------------|--------------------------------|---------------------------------------|--|--|--|------------------|
| Name of assay | Subcellular localization assay | Homogenous time-resolved fluorescence |  |  |  | Co-fractionation |
|---------------|--------------------------------|---------------------------------------|--|--|--|------------------|

|                                                    |                                                                                                               | assay for measurement of protein-protein interaction                                                | Luciferase assay for measurement of transcriptional activity                | Electrophoretic mobility shift assay (EMSA)                            | Western blot                                                           |                                                                                 |
|----------------------------------------------------|---------------------------------------------------------------------------------------------------------------|-----------------------------------------------------------------------------------------------------|-----------------------------------------------------------------------------|------------------------------------------------------------------------|------------------------------------------------------------------------|---------------------------------------------------------------------------------|
| Measured parameter                                 | Subcellular distribution                                                                                      | Homodimer formation (with itself) and heterodimer formation (with other bHLH transcription factors) | Transcriptional activation of E-box containing promoter reporter constructs | DNA binding activity of homo- and heterodimers                         | Protein expression and stability                                       | Localization to the chromatin                                                   |
| Expected deleterious result range (PS3_Supporting) | Localization different compared to wild type TCF4 (e.g. accumulated in nuclear dots, no nuclear accumulation) | <25% homodimer and heterodimer formation compared to wild type                                      | p-value <0.05 compared to wild type luciferase activity                     | Comparison to wild type possible however no robust threshold available | Comparison to wild type possible however no robust threshold available | p-value < 0.05 compared to wild type TCF4. Localization to the soluble fraction |
| Expected benign result range (BS3)                 | Not recommended                                                                                               | Not recommended                                                                                     |                                                                             |                                                                        |                                                                        | Not recommended                                                                 |



|            |                                |                   |                                                         |                   |                   |                |
|------------|--------------------------------|-------------------|---------------------------------------------------------|-------------------|-------------------|----------------|
|            |                                |                   | Not recommended                                         | Not recommended   | Not recommended   |                |
| References | PMID:<br>22460224,<br>22777675 | PMID:<br>22777675 | PMI:<br>17436255,<br>19235238,<br>22460224,<br>22777675 | PMID:<br>22460224 | PMID:<br>22460224 | PMID: 22460224 |

E. *UBE3A* Functional Assays

| Name of assay                                      | E3 ubiquitin ligase activity     | <i>UBE3A</i> protein expression                                                             |
|----------------------------------------------------|----------------------------------|---------------------------------------------------------------------------------------------|
| Measured parameter                                 | E3 ubiquitin ligase activity     | Protein levels monitored to reflect either protein stability or levels of self degradation. |
| Expected deleterious result range (PS3_Supporting) | Loss of substrate ubiquitination | Comparison to WT possible however no robust thresholds available.                           |
| Expected benign result range (BS3)                 | Not recommended                  | Not recommended                                                                             |

References

PMID: 15263005;  
26255772

PMID: 26255772

Supp. Table S3: Application of PP4 Criteria

| <b><i>MECP2</i></b>                                                           | <b><i>FOXP1</i></b>            | <b><i>CDKL5</i></b>                                        | <b><i>TCF4</i></b>            | <b><i>SLC9A6</i></b>       | <b><i>UBE3A</i></b>                                                                         |
|-------------------------------------------------------------------------------|--------------------------------|------------------------------------------------------------|-------------------------------|----------------------------|---------------------------------------------------------------------------------------------|
| <b>Core Features</b>                                                          | <b>Core Features</b>           | <b>Core Features</b>                                       | <b>Core Features</b>          | <b>Core Features</b>       | <b>Core Features</b>                                                                        |
| Regression of developmental progress and loss of at least 2 of 4 of following | Microcephaly                   | Seizures, including infantile spasms, beginning in infancy | Global developmental delay    | Global developmental delay | Delayed attainment of developmental milestones                                              |
| Loss, partial or complete of fine motor skills (hand use)                     | Severe intellectual disability | Global developmental delay                                 | Intellectual disability       | Intellectual disability    | Movement or balance disorder, usually ataxia of gait and/or tremulous movement of the limbs |
| Loss, partial or complete of spoken communication                             | Dyskinesia                     | Intellectual disability                                    | Behavioral problems (anxiety) | Epilepsy                   | Behavioral uniqueness (increased frequent laughter/smiling, hand flapping)                  |

|                                                                  |                                                                                                                              |                                                   |                                                                |                                              |                                                                                 |
|------------------------------------------------------------------|------------------------------------------------------------------------------------------------------------------------------|---------------------------------------------------|----------------------------------------------------------------|----------------------------------------------|---------------------------------------------------------------------------------|
| Abnormal (dyspraxic) or absent gait                              | No period of normal development                                                                                              | Hypotonia                                         | Hand flapping                                                  | Autistic spectrum disorder                   | Seizures                                                                        |
| Stereotypies                                                     | Neonatal hypotonia                                                                                                           | Severely impaired gross motor function            | Characteristic Facial Features (become more apparent with age) | Ataxia                                       | Abnormal EEG, with a characteristic pattern of large-amplitude slow spike waves |
| <b>Supportive features</b>                                       | <b>Supportive features</b>                                                                                                   | Cortical visual impairment in the first 12 months | Deeply set eyes with prominent supraorbital ridges             | Craniofacial dysmorphism                     | Speech impairment with minimal use of words (if over 12 months)                 |
| Periodic breathing (breath-holding/hyper ventilation) when awake | Abnormal brain imaging (e.g. partial agenesis of the corpus callosum, simplified gyral pattern, reduced white matter volume) | <b>Supportive features</b>                        | Mildly up-slanted palpebral fissures                           | <b>Supportive features</b>                   | <b>Additional note</b>                                                          |
| Bruxism when awake                                               | Delayed motor development                                                                                                    | Sleep disturbances                                | Broad nasal root, wide nasal ridge, and                        | Happy, excitable, frequent smiling, laughter | “Angelman syndrome”                                                             |

|                                    |                                |                                                                                                                             |                                                           |                        |  |
|------------------------------------|--------------------------------|-----------------------------------------------------------------------------------------------------------------------------|-----------------------------------------------------------|------------------------|--|
|                                    |                                |                                                                                                                             | wide nasal base with enlarged nostrils                    |                        |  |
| Impaired sleep pattern             | Impairment of postnatal growth | Gastrointestinal dysfunction                                                                                                | Overhanging or depressed nasal tip, which may be pointed  | Angelman-like features |  |
| Abnormal muscle tone               | Stereotypies                   | Subtle dysmorphic features (broad forehead, large, deep-set eyes, tapered fingers, full lips, anteverted nostrils in males) | Short philtrum                                            | Microcephaly           |  |
| Peripheral vasomotor disturbances  | Generalized seizures           | Bruxism                                                                                                                     | Thick vermillion of the lower lip, which is often everted |                        |  |
| Scoliosis/kyphosis                 | GE reflux                      | Hand stereotypies                                                                                                           | Widely spaced teeth                                       |                        |  |
| Growth retardation (small stature) | Poor sleep pattern             | Periodic breathing                                                                                                          | <b>Supportive features</b>                                |                        |  |

|                                            |                                |                                  |                                                                                                                                         |  |  |
|--------------------------------------------|--------------------------------|----------------------------------|-----------------------------------------------------------------------------------------------------------------------------------------|--|--|
| Small, cold hands and feet                 | Unexplained episodes of crying | Laughing, screaming spells       | Prominence of the lower face with a well-developed chin, with age the lower face becomes more prominent and facial features may coarsen |  |  |
| Inappropriate laughing/screaming spells    | Recurrent aspiration           | Cold hands and feet              | Mildly cupped ears with over folded helices                                                                                             |  |  |
| Diminished response to pain                |                                | Peripheral vasomotor dysfunction | In some individuals, wide mouth with downturned corners and exaggerated Cupid's bow or tented vermillion of the upper lip               |  |  |
| Intense eye communication ("eye pointing") |                                |                                  | Happy, excitable, frequent smiling, laughter                                                                                            |  |  |
| <b>Additional note</b>                     |                                |                                  | Episodic periodic breathing                                                                                                             |  |  |

|                 |  |  |                         |  |  |
|-----------------|--|--|-------------------------|--|--|
| "Rett syndrome" |  |  | <b>Additional note</b>  |  |  |
|                 |  |  | "Pitt Hopkins syndrome" |  |  |

PP4 may be applied when the core features are met or in the absence of a single core features, two or more supportive features can be used in it's place. For *UBE3A*, the mandatory feature must be met in addition to round of 4 of the 5 additional features to apply PP4. For *MECP2*, *TCF4*, and *UBE3A*, PP4 may be used when an additional note (a specific clinical diagnosis) is used to describe the patient's clinical presentation.

| <b>Gene</b>          | <b><i>MECP2</i></b>                                                           | <b><i>FOXP1</i></b>            | <b><i>CDKL5</i></b>                                        | <b><i>TCF4</i></b>         | <b><i>SLC9A6</i></b>       | <b><i>UBE3A</i></b>                                            |
|----------------------|-------------------------------------------------------------------------------|--------------------------------|------------------------------------------------------------|----------------------------|----------------------------|----------------------------------------------------------------|
| <b>Core Features</b> | Regression of developmental progress and loss of at least 2 of 4 of following | Microcephaly                   | Seizures, including infantile spasms, beginning in infancy | Global developmental delay | Global developmental delay | <b>Mandatory Feature</b>                                       |
|                      | Loss, partial or complete of fine motor skills (hand use)                     | Severe intellectual disability | Global developmental delay                                 | Intellectual disability    | Intellectual disability    | Severe ID (if 5 years of age or older) or global developmental |

|  |                                                   |                                 |                                                   |                                                                |                            |                                    |
|--|---------------------------------------------------|---------------------------------|---------------------------------------------------|----------------------------------------------------------------|----------------------------|------------------------------------|
|  |                                                   |                                 |                                                   |                                                                |                            | delay (if <5 years of age)         |
|  | Loss, partial or complete of spoken communication | Dyskinesia                      | Intellectual disability                           | Behavioral problems (anxiety)                                  | Epilepsy                   | <b>Additional features</b>         |
|  | Abnormal (dyspraxic) or absent gait               | No period of normal development | Hypotonia                                         | Hand flapping                                                  | Autistic spectrum disorder | Ataxia/jerky movements             |
|  | Stereotypies                                      | Neonatal hypotonia              | Severely impaired gross motor function            | Characteristic Facial Features (become more apparent with age) | Ataxia                     | Characteristic EEG                 |
|  |                                                   |                                 | Cortical visual impairment in the first 12 months | Deeply set eyes with prominent supraorbital ridges             | Craniofacial dysmorphism   | Seizures                           |
|  |                                                   |                                 |                                                   | Mildly up-slanted palpebral fissures                           |                            | Absent speech or less than 5 words |



|  |  |  |  |                                                                                |  |                              |
|--|--|--|--|--------------------------------------------------------------------------------|--|------------------------------|
|  |  |  |  |                                                                                |  | (if at least 4 years of age) |
|  |  |  |  | Broad nasal root, wide nasal ridge, and wide nasal base with enlarged nostrils |  | Frequent smiling             |
|  |  |  |  | Overhanging or depressed nasal tip, which may be pointed                       |  |                              |
|  |  |  |  | Short philtrum                                                                 |  |                              |
|  |  |  |  | Thick vermilion of the lower lip, which is often everted                       |  |                              |
|  |  |  |  | Widely spaced teeth                                                            |  |                              |

|                            |                                                                 |                                                                                                                              |                                                                                                                             |                                                                                                                                         |                                              |  |
|----------------------------|-----------------------------------------------------------------|------------------------------------------------------------------------------------------------------------------------------|-----------------------------------------------------------------------------------------------------------------------------|-----------------------------------------------------------------------------------------------------------------------------------------|----------------------------------------------|--|
| <b>Supportive features</b> | Periodic breathing (breath-holding/hyperventilation) when awake | Abnormal brain imaging (e.g. partial agenesis of the corpus callosum, simplified gyral pattern, reduced white matter volume) | Sleep disturbances                                                                                                          | Prominence of the lower face with a well-developed chin, with age the lower face becomes more prominent and facial features may coarsen | Happy, excitable, frequent smiling, laughter |  |
|                            | Bruxism when awake                                              | Delayed motor development                                                                                                    | Gastrointestinal dysfunction                                                                                                | Mildly cupped ears with overfolded helices                                                                                              | Angelman-like features                       |  |
|                            | Impaired sleep pattern                                          | Impairment of postnatal growth                                                                                               | Subtle dysmorphic features (broad forehead, large, deep-set eyes, tapered fingers, full lips, anteverted nostrils in males) | In some individuals, wide mouth with downturned corners and exaggerated Cupid's bow or tented vermilion of the upper lip                | Microcephaly                                 |  |
|                            | Abnormal muscle tone                                            | Stereotypies                                                                                                                 | Bruxism                                                                                                                     | Happy, excitable, frequent smiling, laughter                                                                                            |                                              |  |

|  |                                         |                                |                                  |                             |  |  |
|--|-----------------------------------------|--------------------------------|----------------------------------|-----------------------------|--|--|
|  | Peripheral vasomotor disturbances       | Generalized seizures           | Hand stereotypies                | Episodic periodic breathing |  |  |
|  | Scoliosis/kyphosis                      | GE reflux                      | Periodic breathing               |                             |  |  |
|  | Growth retardation (small stature)      | Poor sleep pattern             | Laughing, screaming spells       |                             |  |  |
|  | Small, cold hands and feet              | Unexplained episodes of crying | Cold hands and feet              |                             |  |  |
|  | Inappropriate laughing/screaming spells | Recurrent aspiration           | Peripheral vasomotor dysfunction |                             |  |  |
|  | Diminished response to pain             |                                |                                  |                             |  |  |

|                        |                                            |  |  |                         |  |                     |
|------------------------|--------------------------------------------|--|--|-------------------------|--|---------------------|
|                        | Intense eye communication ("eye pointing") |  |  |                         |  |                     |
| <b>Additional note</b> | "Rett syndrome"                            |  |  | "Pitt Hopkins syndrome" |  | "Angelman syndrome" |
